# Supplementary material
Source: Springer Nature journal article supplement (https://www.springermedizin.de/resource/supplementary/12936_2012_2770_MOESM2_ESM.pdf/9544170)

Nuclei

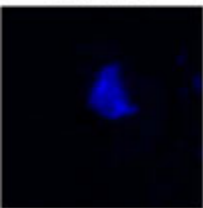

M7-Dansyl

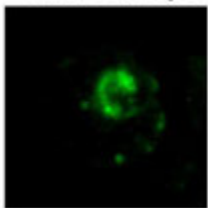

Bodipy

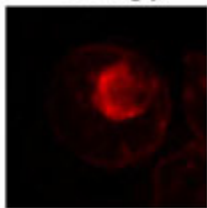

Merge

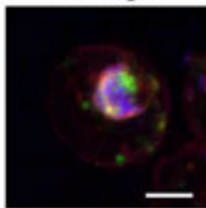

BF

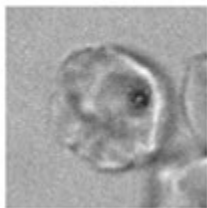

Nuclei

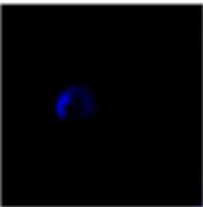

M17-Dansyl

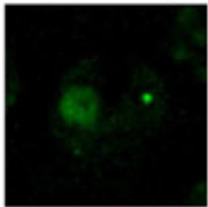

Bodipy

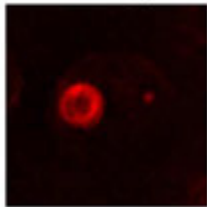

Merge

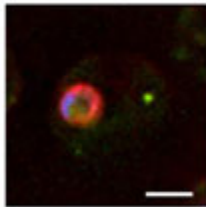

BF

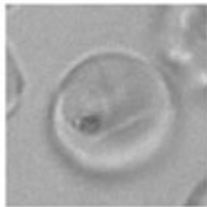

Supplement: MOESM2 [file 9544170]
